# Supplementary material for: A CEP215–HSET complex links centrosomes with spindle poles and drives centrosome clustering in cancer
Source: PubMed Central journal article supplement (PMC4802056; doi:10.1038/ncomms11005), 2016-03-18
Supplement: ncomms11005-s1.pdf [file ncomms11005-s1.pdf]

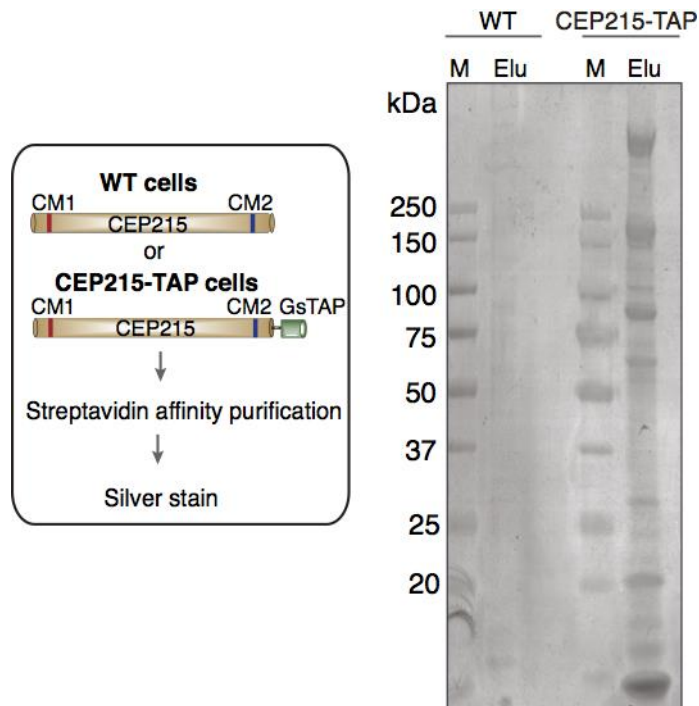

**Supplementary Figure 1. Affinity purification of CEP215-bound protein complexes.** A silver-stained gel representative of the affinity purification experiment employed to identify the CEP215 interactome in Fig 1. Following biotin elution, 50% of the sample was loaded on a gel and processed for silver staining.

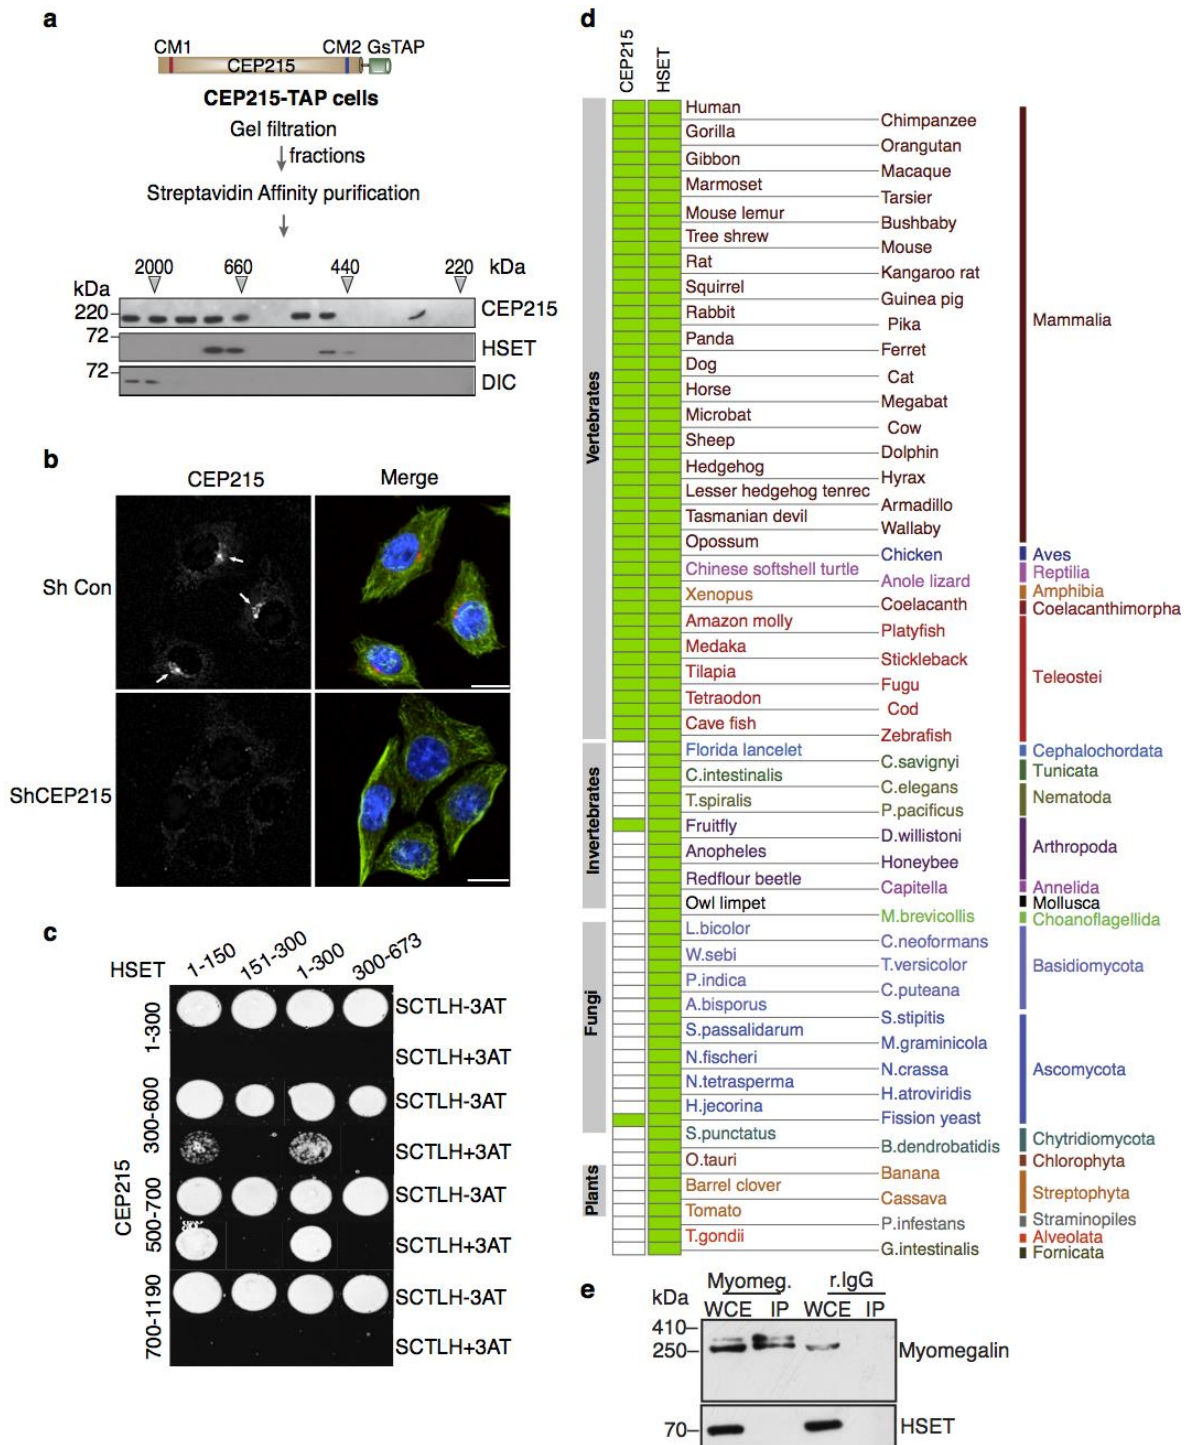

**Supplementary Figure 2. The HSET-CEP215 interaction is specific to the vertebrate lineage.** **a.** Workflow used to identify HSET and dynein complex with CEP215 is shown. Cytoplasmic cell extracts of CEP215-TAP cells were subjected to gel filtration followed by affinity purification of complexes from each fraction. Antibodies used for western blotting are indicated. Arrowheads indicate molecular weights, identified by calibration with molecular weight standards. **b.** Images show HeLa cells stably expressing retroviral scrambled or CEP215-targeting ShRNAs (ShCon and ShCEP215, respectively). Cells are stained for

CEP215 (red in merge) and  $\alpha$ -tubulin (green in merge). DNA is in blue. **c.** Yeast two-hybrid assay between N-terminal truncations of CEP215 (bait) and truncations of HSET (prey). Positive interactions were screened for growth in the presence of 50 mM 3-amino triazole (3AT). **d.** Orthologs from different organisms screened for conservation of aa1-150 of HSET and HBR of CEP215 (extension to *Fig 2f*). Green cells highlight the presence of orthologs while white cells depict the absence of corresponding sequences (see Methods). **e.** WCE of mitotic HeLa cells were subjected to immunoprecipitation by an anti-Myomegalin antibody or random IgG (con) followed by western blotting with the indicated antibodies.





Human/1-150

- Mouse
- Chicken
- Xenopus
- Tetraodon
- Amazon molly
- Anole lizard
- Armadillo
- Bushbaby
- Chinese softshell turtle
- Cassava
- Cat
- Cave fish
- Chimpanzee
- Coelacanth
- Cow
- Dolphin
- Ferret
- Fugu
- Gibbon
- Gorilla
- Guinea pig
- Hedgehog
- Horse
- Kangaroo rat
- Lesser hedgehog tenrec
- Macaque
- Marmoset
- Medaka
- Megabat
- Microbat
- Mouse lemur
- Opossum
- Orangutan
- Panda
- Pika
- Platyfish
- Rabbit
- Rat
- Sheep
- Squirrel
- Stickleback
- Tarsier
- Tasmanian devil
- Tilapia
- Tree shrew
- Zebrafish
- consensus

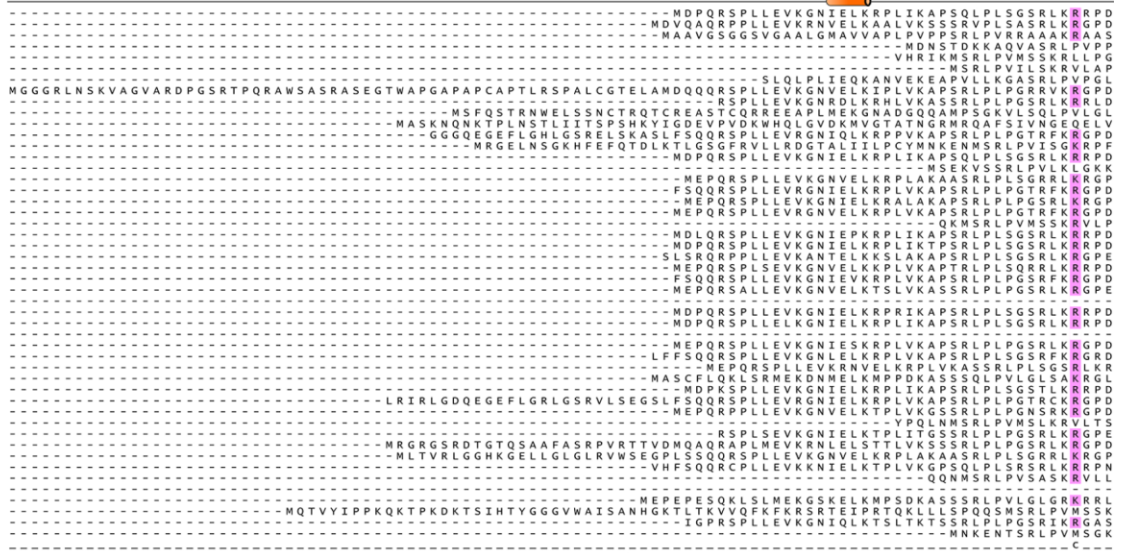

Human/1-150

- Mouse
- Chicken
- Xenopus
- Tetraodon
- Amazon molly
- Anole lizard
- Armadillo
- Bushbaby
- Chinese softshell turtle
- Cassava
- Cat
- Cave fish
- Chimpanzee
- Coelacanth
- Cow
- Dolphin
- Ferret
- Fugu
- Gibbon
- Gorilla
- Guinea pig
- Hedgehog
- Horse
- Kangaroo rat
- Lesser hedgehog tenrec
- Macaque
- Marmoset
- Medaka
- Megabat
- Microbat
- Mouse Lemur
- Opossum
- Orangutan
- Panda
- Pika
- Platyfish
- Rabbit
- Rat
- Sheep
- Squirrel
- Stickleback
- Tarsier
- Tasmanian devil
- Tilapia
- Tree shrew
- Zebrafish
- consensus

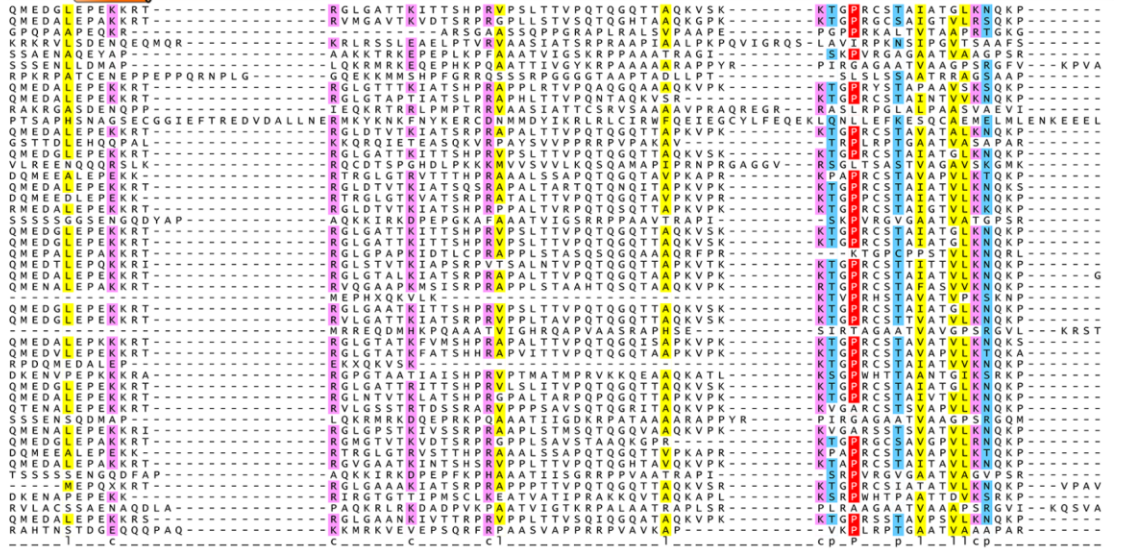

Human/1-150

- Mouse
- Chicken
- Xenopus
- Tetraodon
- Amazon molly
- Anole lizard
- Armadillo
- Bushbaby
- Chinese softshell turtle
- Cassava
- Cat
- Cave fish
- Chimpanzee
- Coelacanth
- Cow
- Dolphin
- Ferret
- Fugu
- Gibbon
- Gorilla
- Guinea pig
- Hedgehog
- Horse
- Kangaroo rat
- Lesser hedgehog tenrec
- Macaque
- Marmoset
- Medaka
- Megabat
- Microbat
- Mouse lemur
- Opossum
- Orangutan
- Panda
- Pika
- Platyfish
- Rabbit
- Rat
- Sheep
- Squirrel
- Stickleback
- Tarsier
- Tasmanian devil
- Tilapia
- Tree shrew
- Zebrafish
- consensus

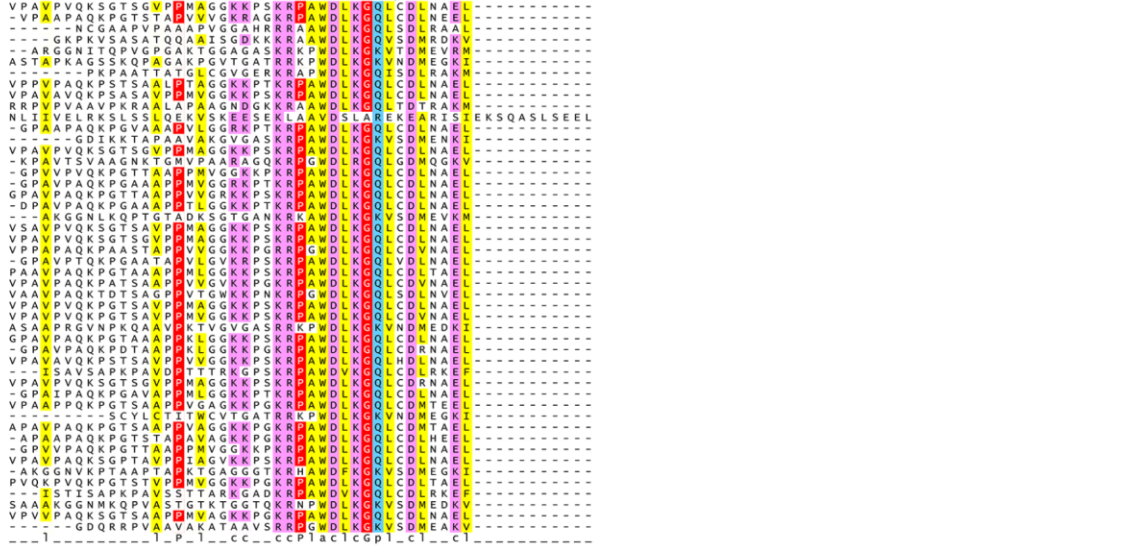

a:aromatic: FWYH    c:charged: EDKRH    l:aliphatic: ILVA  
 p:polar: STCDEHKNQR    x:conserved: X  
 Helix:    Strand:

**Supplementary Figure 4. Sequence alignment of the CEP215-interacting region of HSET. This region corresponds to aa1-150.**

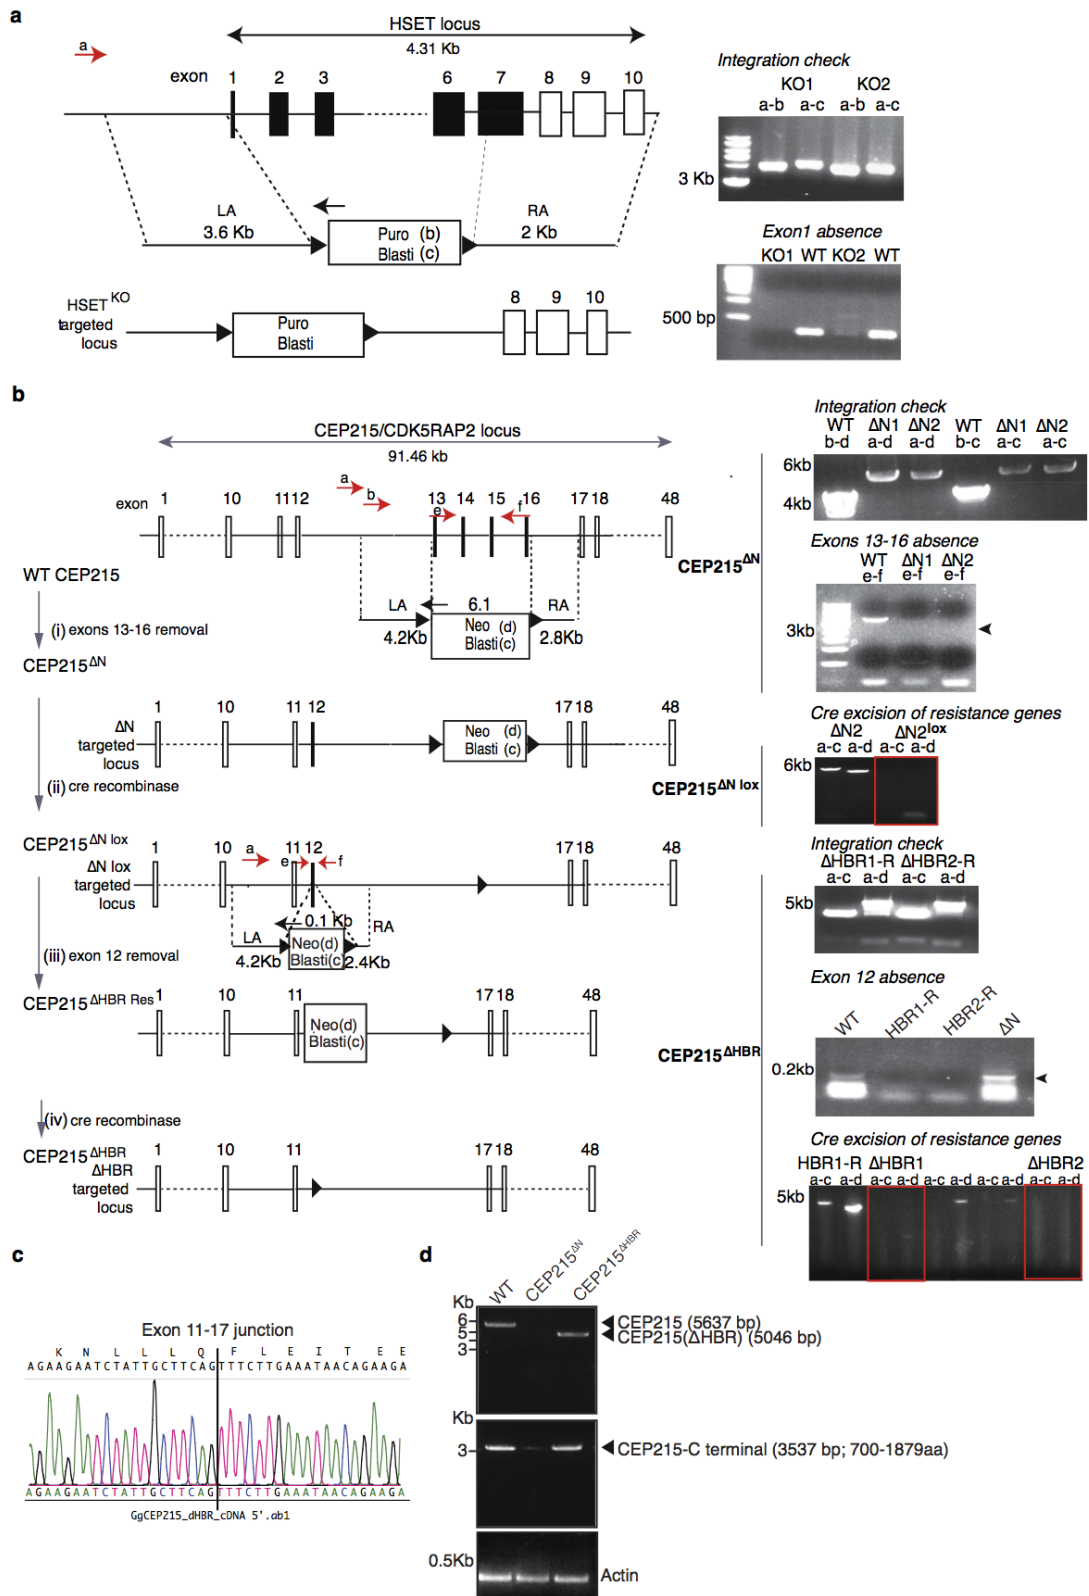

**Supplementary Figure 5. Generation of  $HSET^{KO}$ ,  $CEP215^{\Delta HBR}$ ,  $CEP215^{\Delta N}$  DT40 cells. a.** Design of homologous gene targeting of  $HSET$  alleles in DT40 cells. To generate  $HSET^{KO}$  alleles, exons 1-7 were replaced by blasticidin and then puromycin resistance genes. Homology arms flanking the targeted region are marked as LA and RA. Using primer position (a) and sequences from the antibiotic resistance cassettes, diagnostic PCR reactions

were used to confirm integration of antibiotic resistance cassettes at correct genomic loci. PCRs of genomic DNA extracted from cells of indicated genotypes are shown. An additional primer that maps within targeted region was used to confirm HSET<sup>KO</sup> clones. Exon 1 was absent in two different HSET<sup>KO</sup> clones but present in WT. **b.** Design of homologous gene targeting of CEP215 alleles in DT40 cells. Chicken CEP215<sup>ΔHBR</sup> corresponds to aa468-665. Homology arms flanking the targeted region are marked as LA and RA. Locations of primers are marked on the CEP215 locus. CEP215<sup>ΔHBR</sup> cells were generated in a 4-step strategy (i-iv). For each step diagnostic PCRs using genomic DNA from relevant cells are shown on right to confirm correct genotypes. First, exons 13-16 of the two CEP215 alleles were sequentially replaced by neomycin- and blasticidin-resistance genes, thereby generating the intermediate CEP215<sup>ΔN</sup> cell line (i). Primer pairs a-d and a-c were used to check for the targeted integration of the homologous gene-targeting construct containing neomycin and blasticidin, respectively. Primer pair e-f maps to targeted region (exons 13-16) and the absence of PCR product confirms successful targeting of this region in both alleles of CEP215<sup>ΔN</sup> cells. Second, antibiotic resistance genes were removed by cre expression to produce CEP215<sup>ΔN-lox</sup> alleles (ii). Third, removal of exon 12 in CEP215<sup>ΔN-lox</sup> cells generated CEP215<sup>ΔHBR-R</sup> cells (iii). Fourth, these cells were then subjected to cre recombinase-mediated excision of resistance genes to generate the CEP215<sup>ΔHBR</sup> alleles (iv). **c.** Confirmation of in-frame HBR deletion (i.e. fusion of exon 11 to 17) by sequencing reverse transcribed CEP215 mRNAs from wild-type and CEP215<sup>ΔHBR</sup> cells. **d.** PCRs with primers against exons 1 and 48 and exons 17 and 48 (CEP215 C terminal) of CEP215 were performed mRNAs isolated and reverse transcribed from wild-type, CEP215<sup>ΔN</sup> and CEP215<sup>ΔHBR</sup> cells.

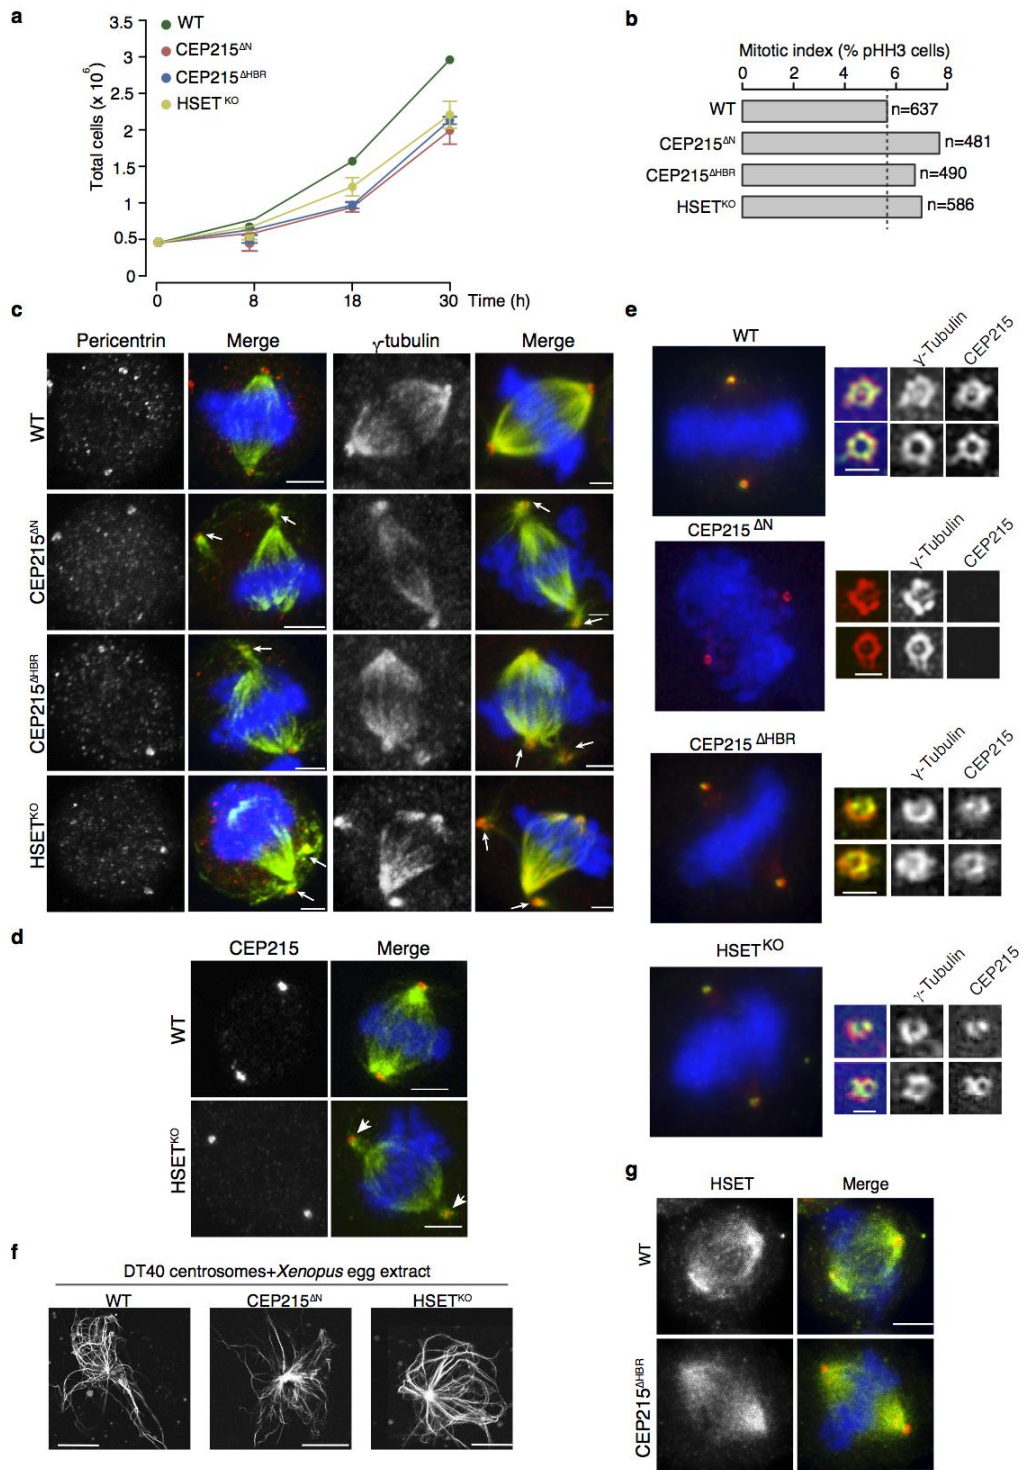

**Supplementary Figure 6. Centriole integrity and nucleation potential are preserved in CEP215<sup>ΔHBR</sup>, CEP215<sup>ΔN</sup> and HSET<sup>KO</sup> cells.** **a.** CEP215<sup>ΔHBR</sup>, CEP215<sup>ΔN</sup> and HSET<sup>KO</sup> cells display mild growth impairment. Total number of viable cells over the indicated time period analysed by Vi-Cell. **b.** Graph shows mitotic index of CEP215<sup>ΔHBR</sup>, CEP215<sup>ΔN</sup> and HSET<sup>KO</sup> scored as percentage of cells with positive phospho-histone H3 staining (pHH3). Total number of cells analysed is indicated. **c.** Images show cells stained for pericentrin (red in merge) or  $\gamma$ -tubulin (red in merge) with  $\alpha$ -tubulin (green in merge). DNA is stained blue.



Arrows mark detached centrosomes. Genotypes are indicated on left. **d.** Images show cells stained for CEP215 (red in merge) and  $\alpha$ -tubulin (green in merge). DNA is stained blue. Scale bars=3  $\mu$ m. Genotypes are indicated on left. **e.** 3D structured illumination microscopy (SIM) images of mitotic cells stained for  $\gamma$ -tubulin (red in merge) and CEP215 (green in merge). DNA is stained blue. Ring structures are present in all genotypes. Scale bars=0.5 $\mu$ m. Images represent maximum projections. **f.** Microtubule nucleation potential of centrosomes isolated from WT, CEP215 <sup>$\Delta$ N</sup> and HSET<sup>KO</sup> cells were assayed using mitotic *Xenopus* egg extracts. Images show examples for centrosomal asters for each genotype. **g.** Images show cells stained for HSET (green in merge) and  $\gamma$ -tubulin (red in merge). DNA is stained blue. Genotypes are indicated on left. Scale bars=3  $\mu$ m

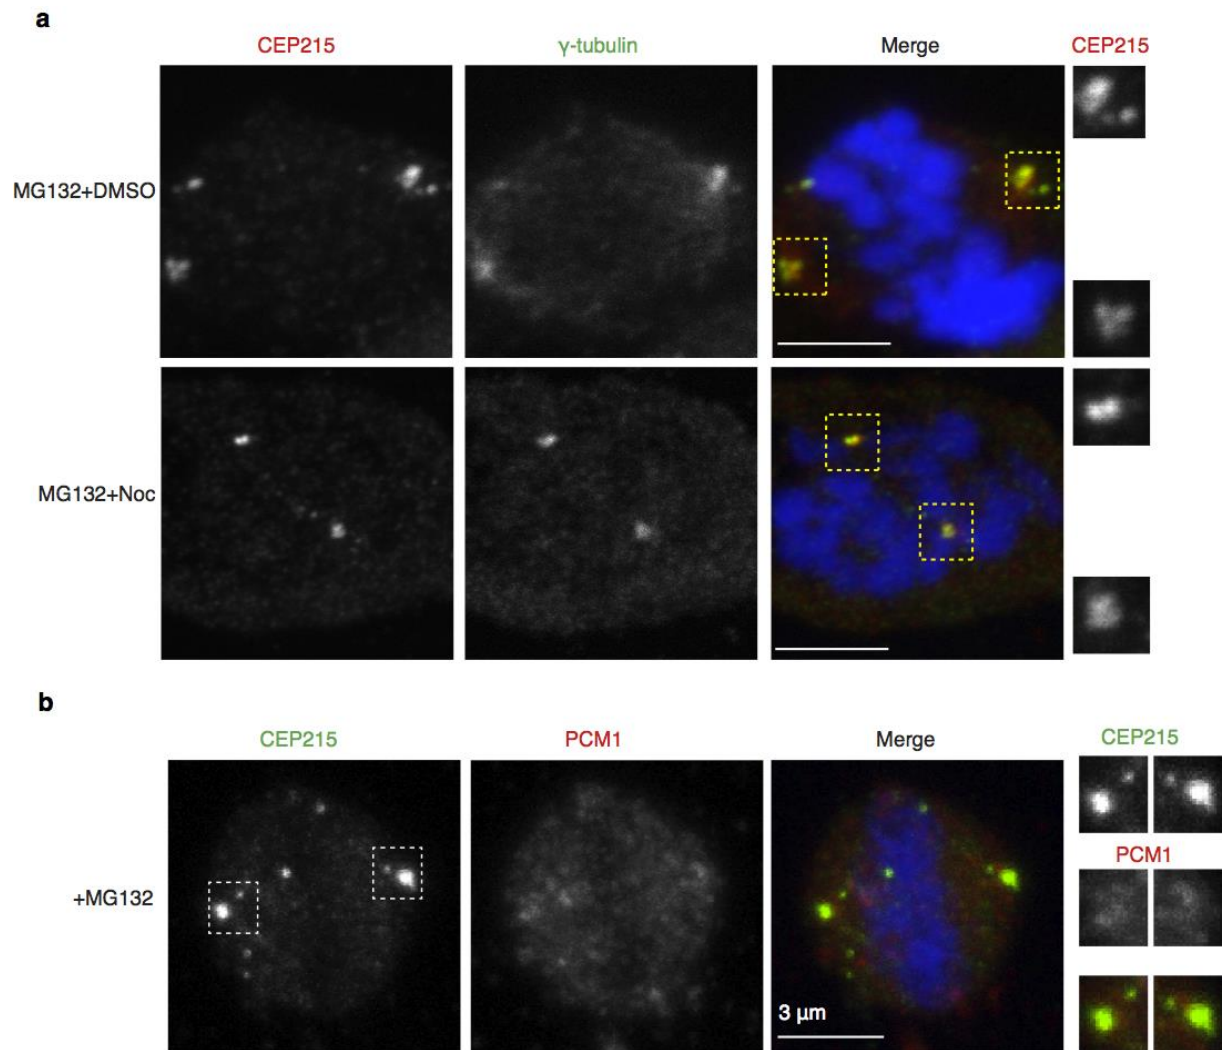

**Supplementary Figure 7. CEP215 flares are sensitive to microtubule depolymerisation.**

**a.** Representative images show MG132-treated mitotic cells stained for CEP215 (green in merge) and  $\gamma$ -tubulin (red in merge) in DT40 cells following 1-hour treatment with DMSO or nocodazole (1 $\mu$ g/ml). DNA is in blue. Insets show flares of CEP215. Scale bar= 4 $\mu$ m **b.** Images show MG132-treated cells stained for CEP215 (green in merge) and PCM1 (red in merge) in DT40 cells.

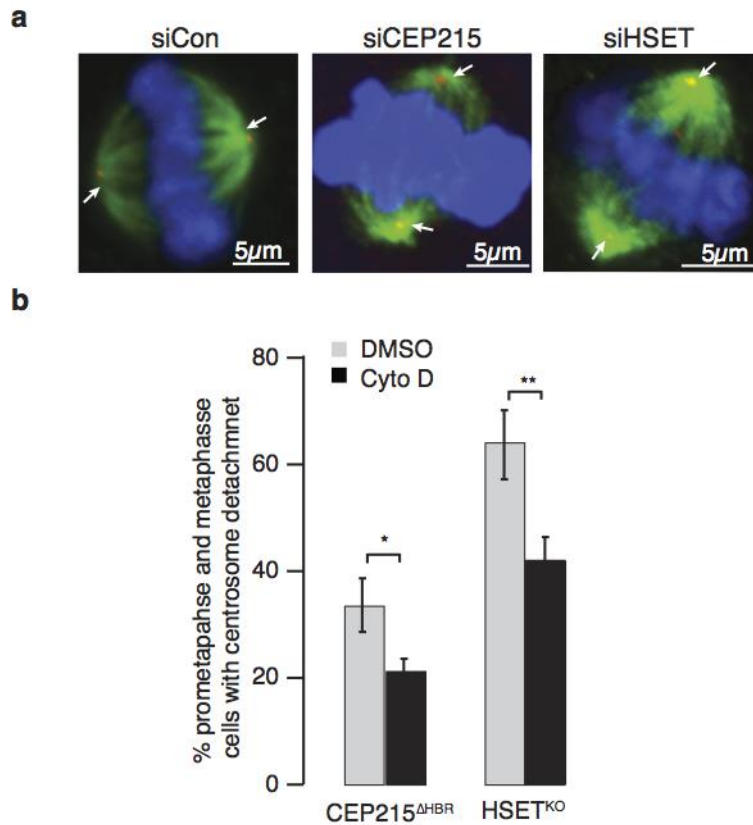

**Supplementary Figure 8. Actin depolymerisation partially suppresses centrosome detachment.** **a.** Images depict centrosome positioning in mitotic HeLa cells treated with control (siCon), CEP215 (siCEP215) or HSET (siHSET) siRNAs for 72 hours. Cells were cells stained for the centrosomal marker centrin (red in merge) and the spindle protein, TPX2 (green in merge). DNA is in blue. Arrows indicate centrosomes off-centered with respect to spindle axis. **b.** Graph depicts quantification of centrosome detachment phenotype following 1-hour treatment of WT and CEP215<sup>ΔHBR</sup> DT40 cells with DMSO or 1 μg/ml cytochalasin D. Paired t-test (\*= p<0.05, \*\*=p<0.005); n=3 biological replicates.

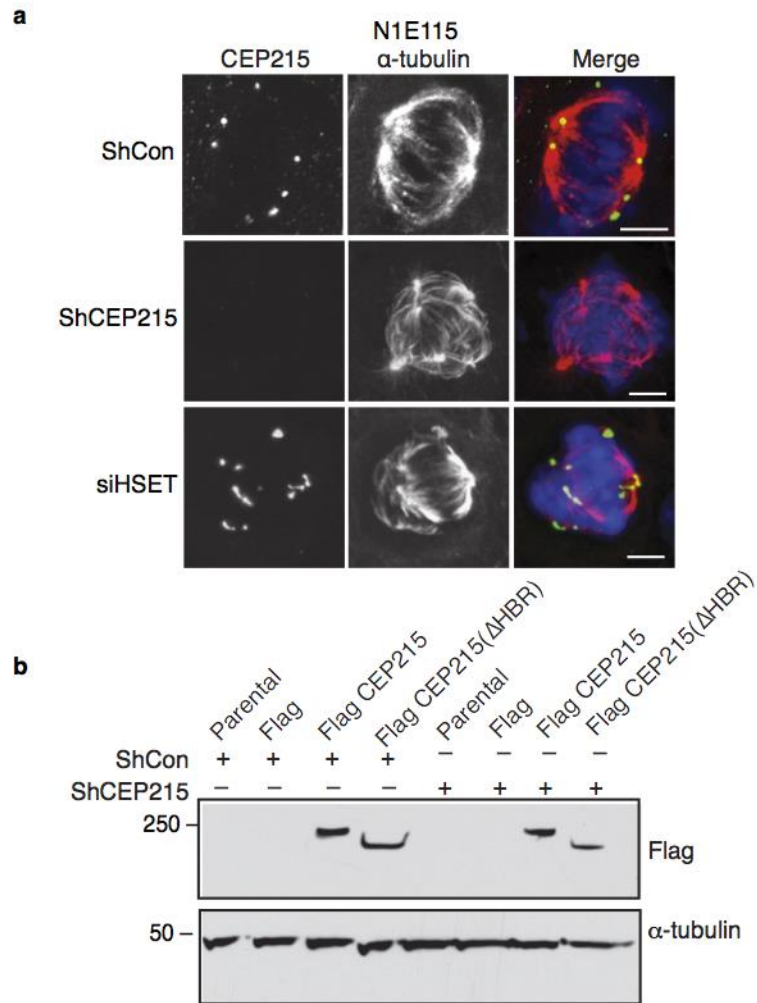

**Supplementary Figure 9. CEP215 depletion in N1E115 cells. a.** Images show cells treated with control (ShCon) or CEP215 (ShCEP215) shRNAs, or HSET siRNA. Cells were stained for CEP215 (green in merge) and  $\alpha$ -tubulin (red in merge). DNA is in blue. Scale bars=8 $\mu$ m  
**b.** Parental N1E-115, or cells carrying stably integrated Flag, Flag-CEP215 and Flag-CEP215(HBR) constructs, were transduced with control (shCon) or CEP215 (shCEP215) shRNAs. Whole cell extracts were immunoblotted for Flag expression.



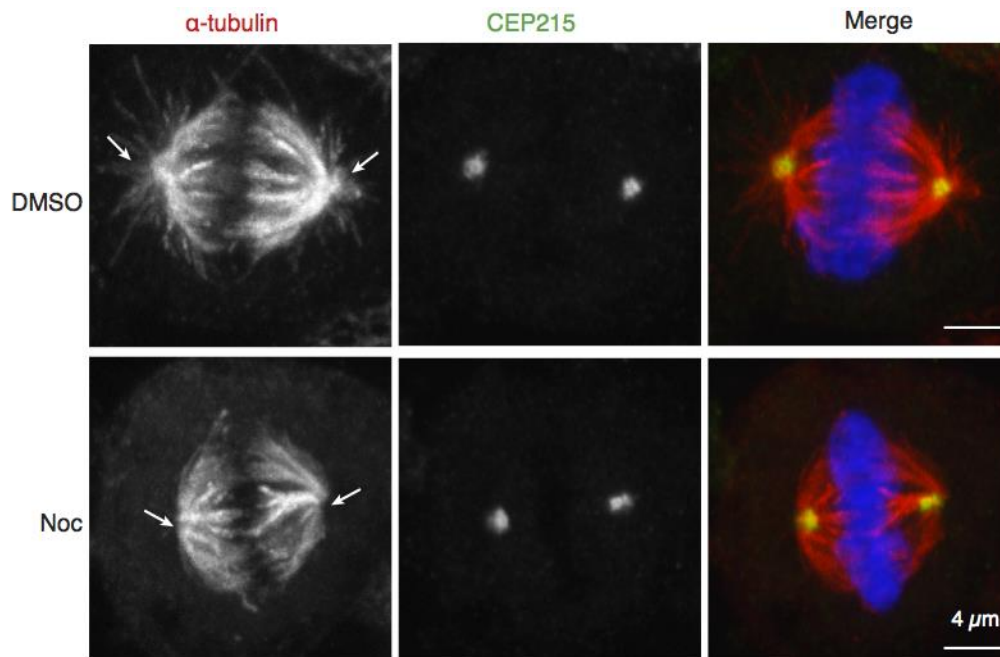

**Supplementary Figure 10. Centrosomes are found within spindle poles when astral microtubules are depolymerized.** Images show HeLa cells following 10 minute treatment with DMSO or 10nM nocodazole. Cells were stained for CEP215 (green in merge) and  $\alpha$ -tubulin (red in merge). DNA is in blue. Arrows mark astral microtubules.

Figure 1c

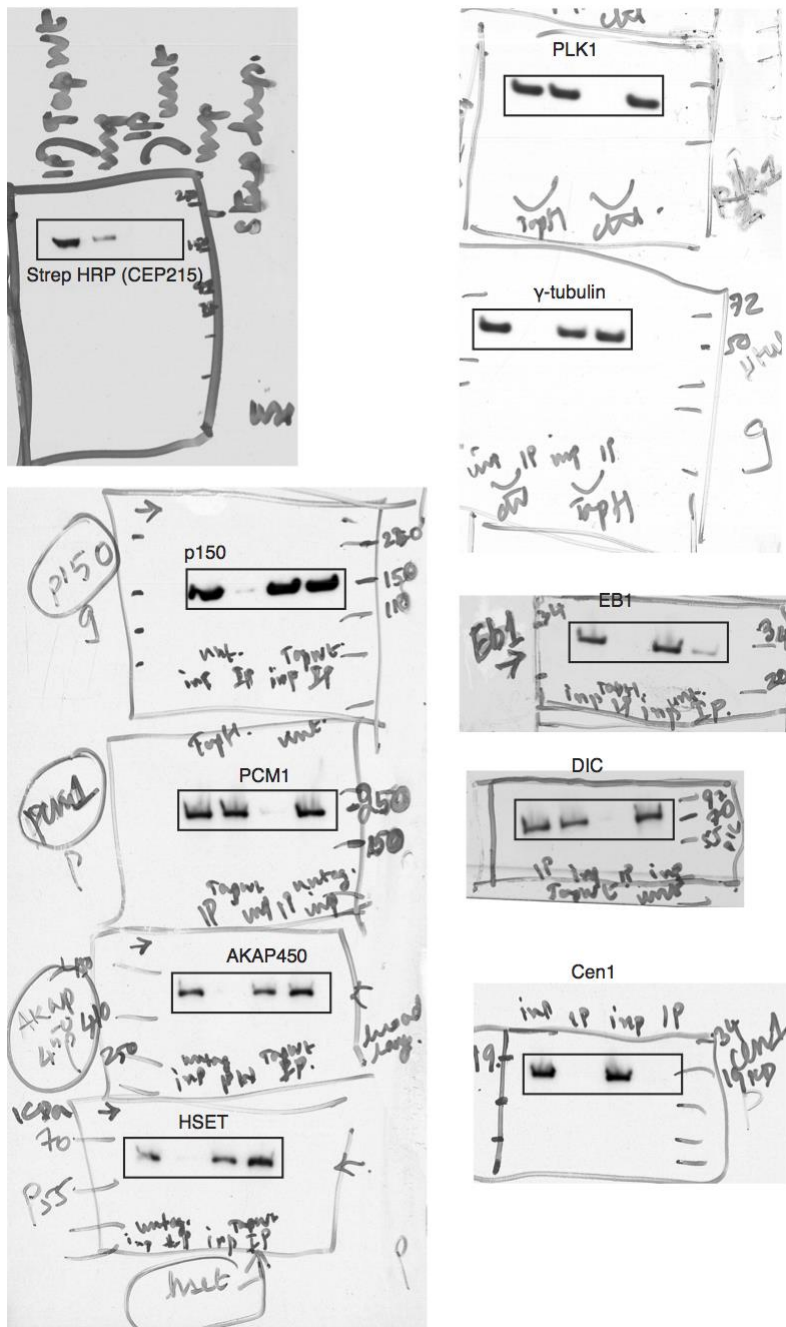

**Supplementary Figure 11.** Full size scans of blots related to Fig. 1c. The cropped regions are indicated by black rectangles and the antibody used is indicated.

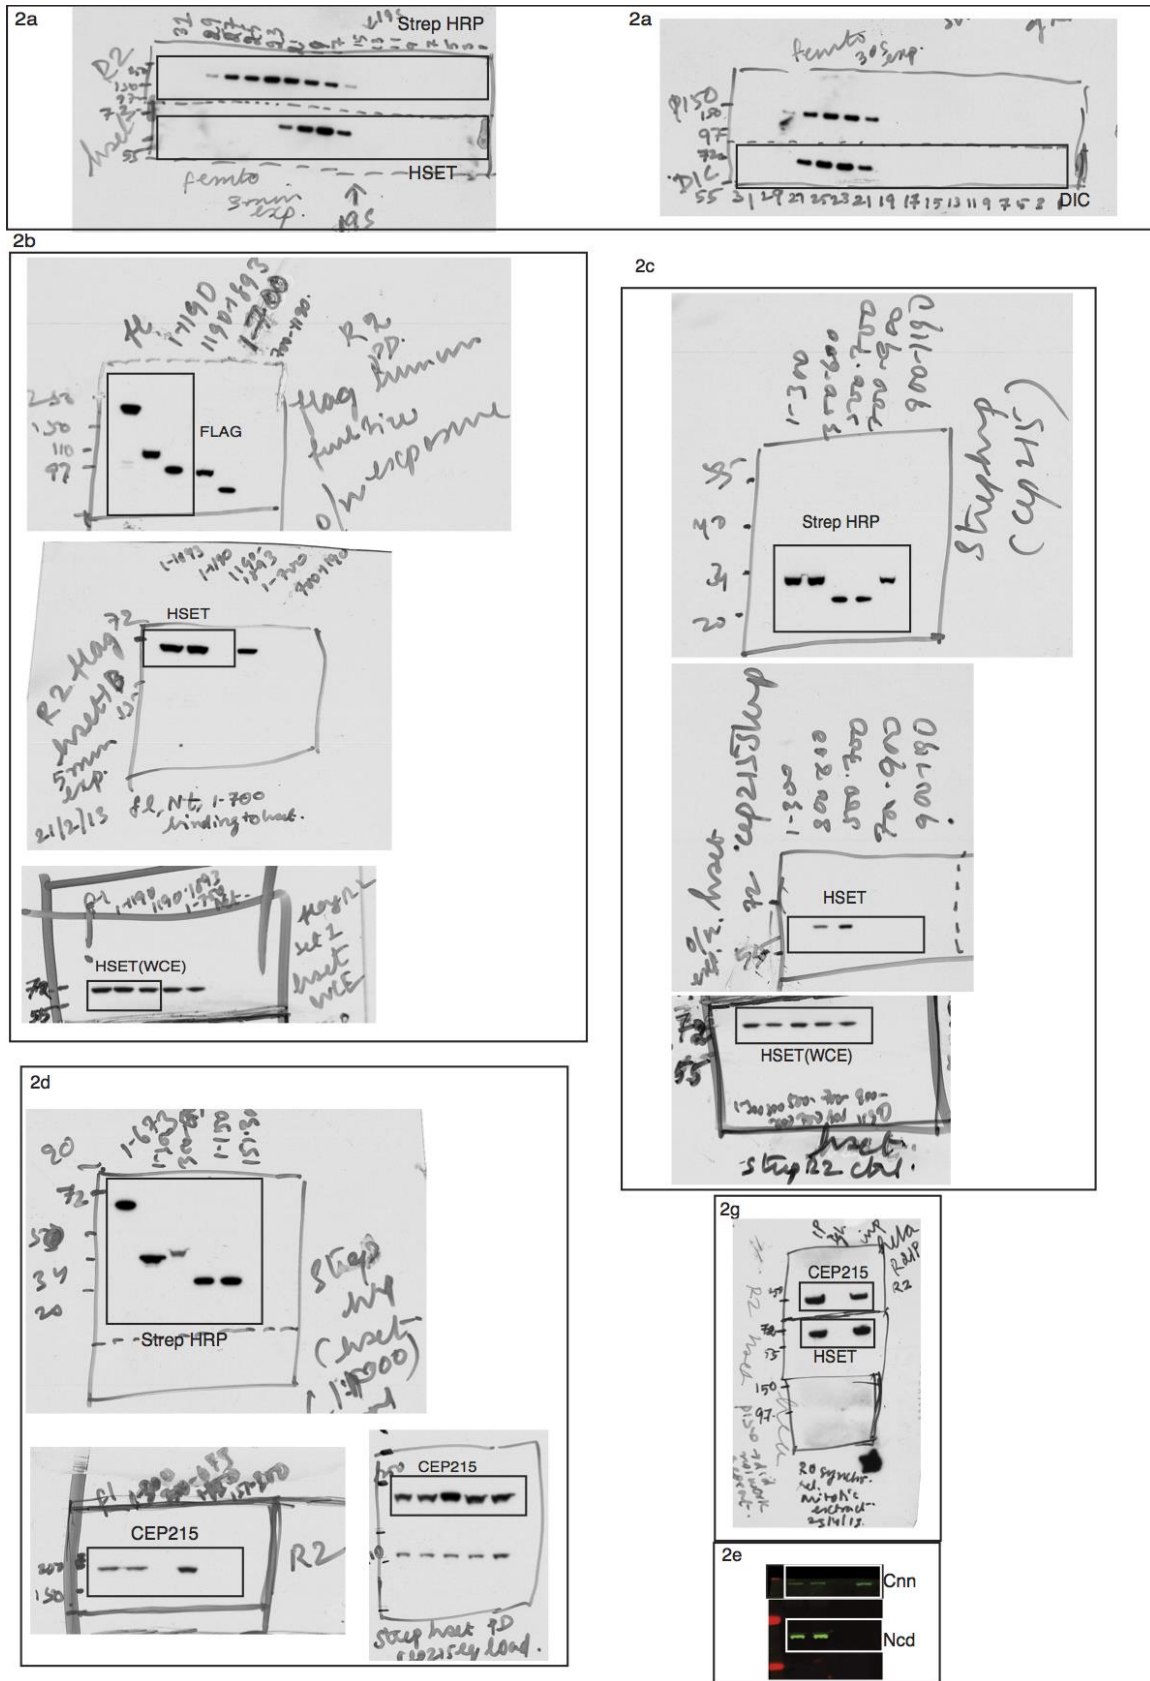

**Supplementary Figure 12.** Full size scans of blots related to Fig. 2. The cropped regions are indicated by black rectangles and the antibody used is indicated.





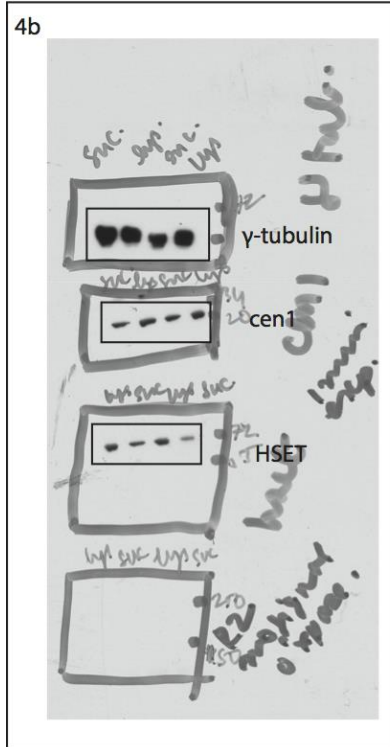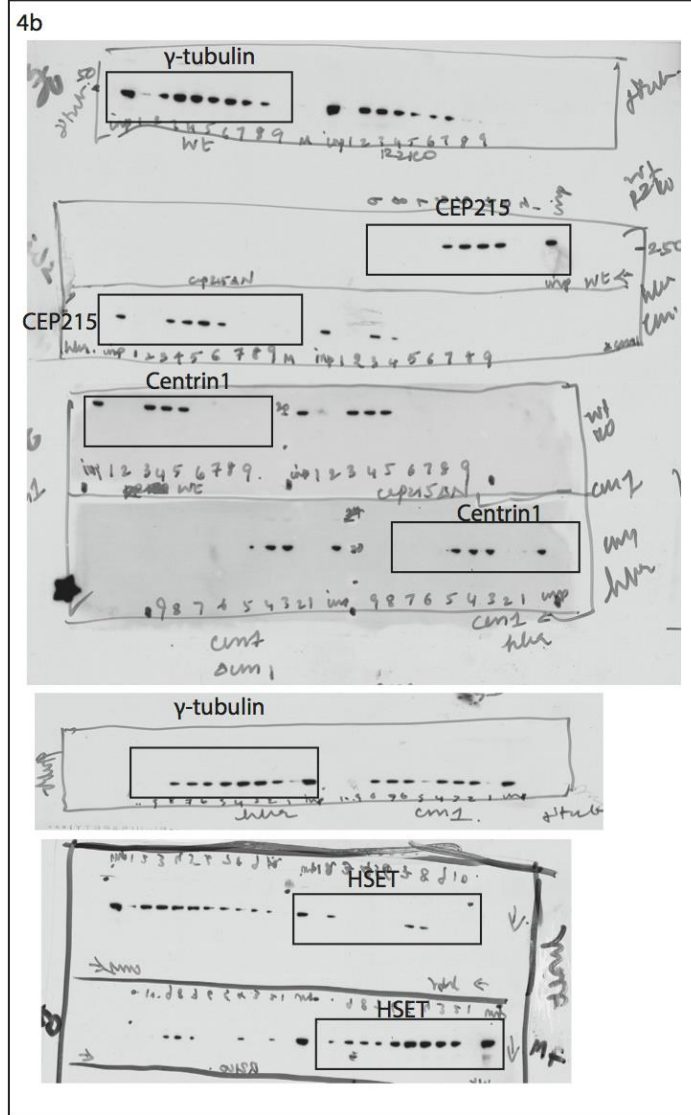

**Supplementary Figure 14.** Full size scans of blots related to Fig. 4. The cropped regions are indicated by black rectangles and the antibody used is indicated.

5b

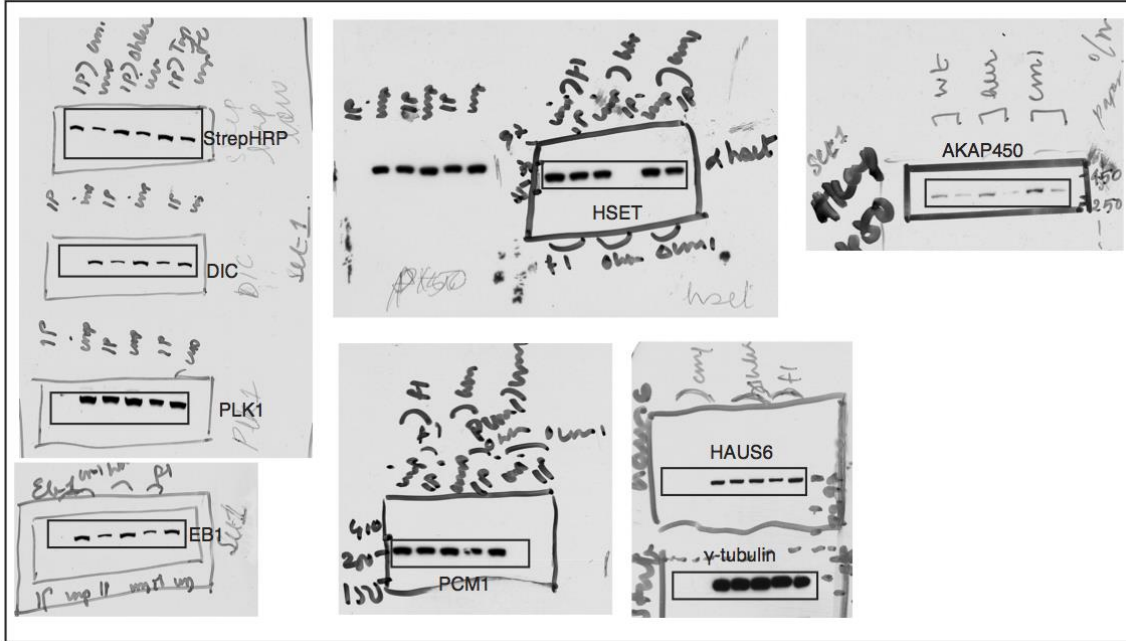

5d

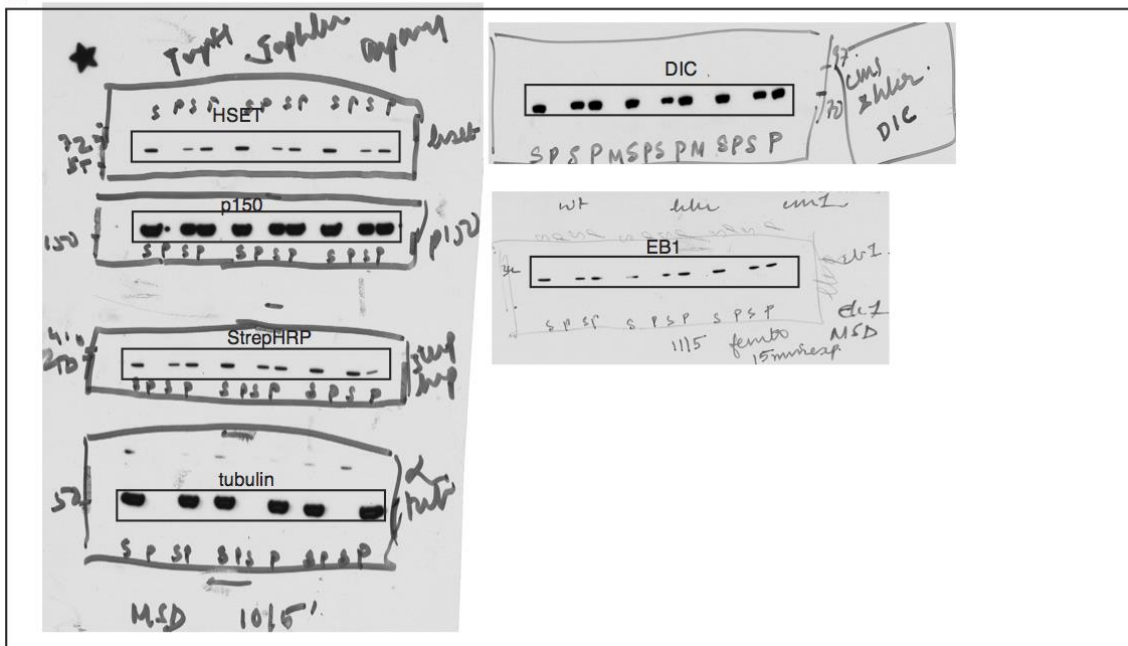

**Supplementary Figure 15.** Full size scans of blots related to Fig. 5. The cropped regions are indicated by black rectangles and the antibody used is indicated. Note that the blot in Fig. 5a is full size.

6b

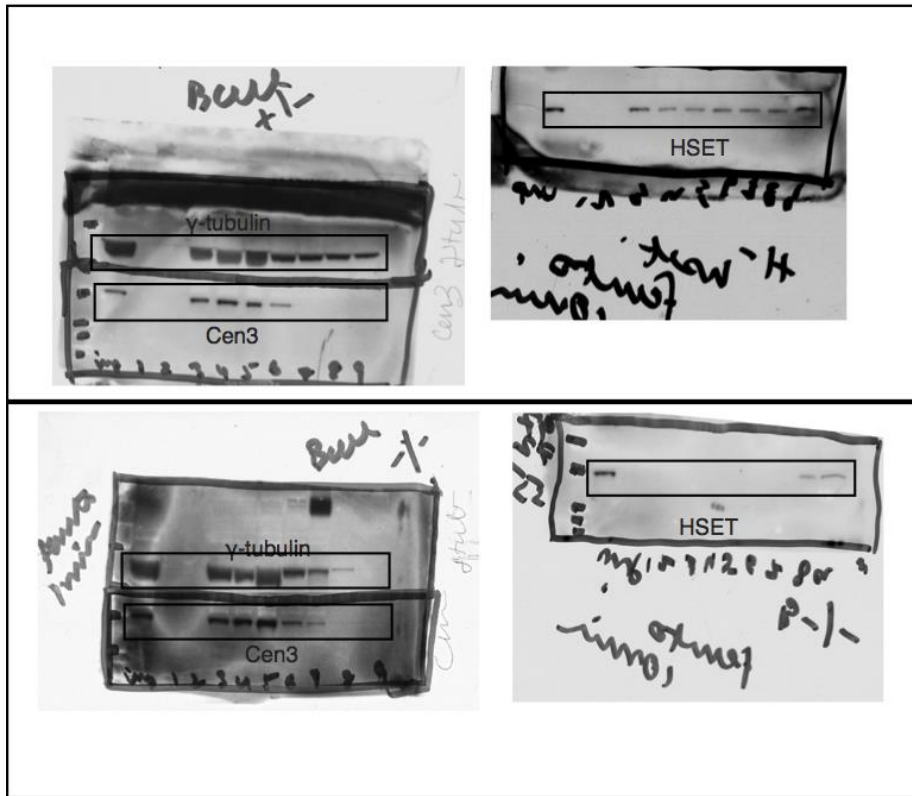

**Supplementary Figure 16.** Full size scans of blots related to Fig. 6b. The cropped regions are indicated by black rectangles and the antibody used is indicated. Note that the blot in Fig. 6a is full size.

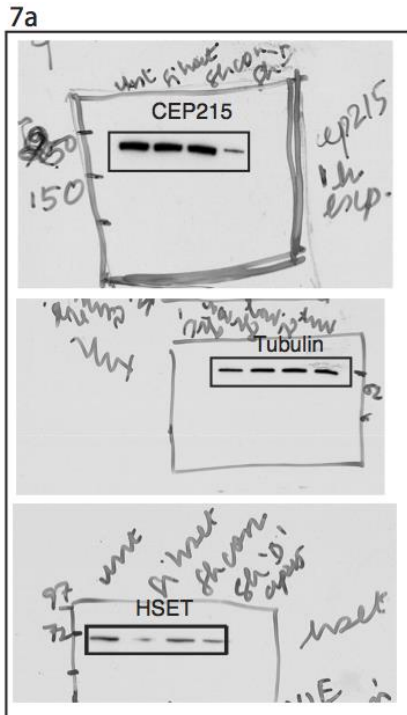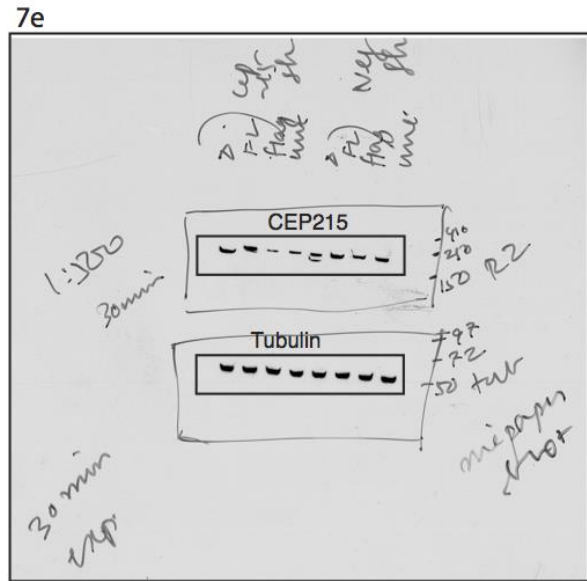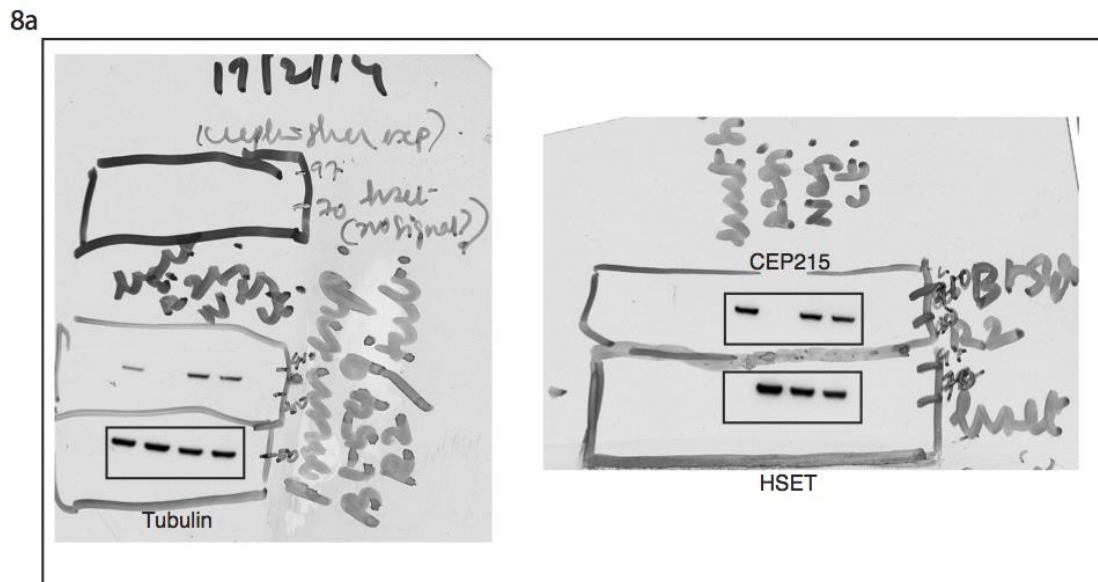

**Supplementary Figure 17.** Full size scans of blots related to Figs. 7 and 8. The cropped regions are indicated by black rectangles and the antibody used indicated.



| Accession no. | Protein        | Unique peptides<br>(Coverage) |                           |                             | $\Sigma$ # PSMs |           |            |
|---------------|----------------|-------------------------------|---------------------------|-----------------------------|-----------------|-----------|------------|
|               |                | Exp1                          | Exp2                      | Exp2                        | PSM1            | PSM2      | PSM3       |
| <b>F1NH99</b> | <b>CEP215</b>  | <b>30</b><br><b>(21.61)</b>   | <b>9</b><br><b>(8.04)</b> | <b>69</b><br><b>(41.04)</b> | <b>57</b>       | <b>16</b> | <b>184</b> |
| A0A023PTR9    | HSET           | 13<br>(22.51)                 | 6<br>(15.76)              | 3<br>(6.43)                 | 28              | 14        | 5          |
| E1BQS8        | CCDC77         | 4<br>(15.21)                  | 5<br>(16.67)              | 2<br>(6.67)                 | 8               | 9         | 4          |
| E1BR81        | WDR67          | 5<br>(7.77)                   | 4<br>(5.55)               | 1<br>(1.2)                  | 10              | 7         | 2          |
| E1BSR3        | CLASP2         | 13<br>(16.84)                 | 9<br>(10.92)              | 1<br>(1.26)                 | 30              | 20        | 2          |
| E1BTL1        | AZI1           | 17<br>(22.75)                 | 13<br>(19.27)             | 9<br>(13.49)                | 35              | 28        | 18         |
| E1BVH4        | SEPT7          | 5<br>(18.31)                  | 5<br>(18.07)              | 12<br>(36.39)               | 13              | 14        | 46         |
| E1C062        | IST1           | 5<br>(22.5)                   | 6<br>(22.68)              | 4<br>(14.11)                | 16              | 13        | 10         |
| E1C245        | LOC101750034   | 15<br>(4.77)                  | 20<br>(7.41)              | 20<br>(5.3)                 | 31              | 40        | 40         |
| E1C3D2        | SEPT2          | 4<br>(14.09)                  | 6<br>(24.31)              | 12<br>(50.28)               | 10              | 11        | 26         |
| E1C834        | PCM1           | 17<br>(13.49)                 | 11<br>(7.6)               | 21<br>(13.89)               | 33              | 21        | 45         |
| E1C9H8        | PRKAR2A        | 8<br>(31.25)                  | 3<br>(13.5)               | 14<br>(51.75)               | 17              | 6         | 44         |
| F1NCX7        | PLK1           | 5<br>(8.55)                   | 4<br>(8.1)                | 3<br>(8.7)                  | 10              | 8         | 6          |
| F1NKL4        | DYNC1H1        | 85<br>(26.5)                  | 31<br>(10.73)             | 15<br>(4.4)                 | 179             | 56        | 30         |
| F1NLX2        | SEPT6          | 6<br>(26.06)                  | 9<br>(23.94)              | 7<br>(32.39)                | 15              | 20        | 28         |
| F1N9Y0        | TUBG1          | 8<br>(31.38)                  | 4<br>(18.03)              | 4<br>(14.75)                | 18              | 9         | 8          |
| Q5F3T2        | SEPT9          | 4<br>(8.05)                   | 8<br>(21.58)              | 10<br>(21.4)                | 8               | 19        | 27         |
| Q5ZK62        | ACAP2          | 10<br>(23.82)                 | 16<br>(33.2)              | 19<br>(33.93)               | 31              | 43        | 45         |
| Q5ZLC7        | EB1            | 4<br>(24.81)                  | 1<br>(6.98)               | 9<br>(43.8)                 | 7               | 2         | 17         |
| Q9PTG6        | DCTN2          | 8<br>(26.62)                  | 2<br>(8.46)               | 5<br>(17.66)                | 16              | 4         | 9          |
| Q9W6V0        | AKAP9/Hyperion | 33<br>(12.72)                 | 9<br>(3.51)               | 148<br>(47.43)              | 66              | 15        | 362        |
| R4GIN8        | PRKACB         | 4<br>(18.75)                  | 1<br>(7.14)               | 12<br>(42.56)               | 8               | 2         | 27         |
| R4GJ34        | CKAP5          | 15<br>(12.09)                 | 22<br>(16.26)             | 4<br>(3.02)                 | 29              | 48        | 6          |

**Supplementary Table 1. List of selected candidates used to construct network in Fig. 1b.**

For each protein the number of unique peptides and the coverage (parentheses) are shown together with the sum of spectral matches obtained from SEQUEST and MASCOT searches in each experiment. Briefly, putative interactors had to be present in all 3 experiments with at

least 4 unique peptides in 2 of these and had to be absent from control pull downs. We excluded all proteins with exclusive nuclear and membrane localisation.

| <b>DT40 constructs</b>   |                                                               |
|--------------------------|---------------------------------------------------------------|
| HSET KO LA F (Kpn1)      | <u>ccagg</u> taccGATGAGATCTTCCTCTCATCA                        |
| HSET KO LAR(Bamh1)       | <u>ccactcgag</u> TCGCCGCAATCGCTTCCTCACT                       |
| HSET KO RA F (Bamh1)     | <u>ccaggatcc</u> TTCCTGGAGATCTACAACGAGTCG                     |
| HSET KO RA R (Not1)      | <u>ccagcgccgc</u> GCAGATCTCAGCCTGAGGTGC                       |
| Integration check LA F   | AGGGACTGCACATGGGATGA                                          |
| HSET KO absence F        | ATGGCGGCGGTGGGGTCTGGAGGGA                                     |
| HSET KO R absence R      | AGGCCCTGCTCGGGAGCCGC                                          |
| CEP215 ΔN LA F (Apa1)    | <u>ccagggccc</u> TTATAGTCCAGTAATCTCGCCA                       |
| CEP215 ΔN LA R (Bamh1)   | <u>cgcgatcc</u> CTAAATTAAGAAGAACAATAG                         |
| CEP215 ΔN RA F (Bamh1)   | <u>cgcgatcc</u> AGTTTGGATCATTAAATTCCT                         |
| CEP215 ΔN RA R (Not11)   | <u>ccagcgccgc</u> ATTTCAACCAGACTGGCACT                        |
| Integration check LA F   | ATATTAGCAGCATTTCATCTTAG                                       |
| CEP215ΔN absence F       | GGTGCAGACCTTTAAGGAATCA                                        |
| CEP215ΔN absence R       | AAAAGTAGTGTTCTCAGAATG                                         |
| CEP215 ΔHBR LA F (Kpn1)  | <u>ccagg</u> taccACCTCTATTGCCATGCAGAT                         |
| CEP215 ΔHBR LA F (Bamh1) | <u>cgcgatcc</u> CTAACAAAGGAAAACAATGAT                         |
| CEP215 ΔHBR RA F (Spe1)  | <u>cgactagt</u> GTGAGTTTCATATAACTGTGA                         |
| CEP215 ΔHBR RA R (Not1)  | ccagcgccgcTGTGTTGTTTGCAGAAACAT                                |
| Integration check LA F   | AGTAAATGGTAGCTGTTTGCTT                                        |
| CEP215 ΔHBR absence F    | AAATCTGATGAAACAATTA                                           |
| CEP215 ΔHBR absence R    | CTCTAACTCTCTGACTATCCTG                                        |
| <b>Human constructs</b>  |                                                               |
| CEP215 ΔHBR F            | ACAGAGCTTCTGGCTAGC                                            |
| CEP215 ΔHBR R            | ATCTTTTTTCATTGAATTTCTGAAGC                                    |
| CEP215 1F                | <u>ggggacaagttgtacaaaaagcaggcttc</u> ATGATGGACTTGGTGTG        |
| CEP215 aa300 F           | <u>ggggacaagttgtacaaaaagcaggcttc</u> GAAGAGGACCTGAGAGAG       |
| CEP215 aa500 F           | <u>ggggacaagttgtacaaaaagcaggcttc</u> GATTTGGAAGTAATACAG       |
| CEP215 aa700 F           | <u>ggggacaagttgtacaaaaagcaggcttc</u> ACAGAACAAACAGAGCTT       |
| CEP215 aa900 F           | <u>ggggacaagttgtacaaaaagcaggcttc</u> CCGATCAACACTGCACTC       |
| CEP215 aa 300R           | <u>ggggaccactttgtacaagaagctgggtccta</u> CTTCTCCTGGACTCTCTC    |
| CEP215 aa600 R           | <u>ggggaccactttgtacaagaagctgggtccta</u> CTCGTCCTACACGAAAGT    |
| CEP215 aa700 R           | <u>ggggaccactttgtacaagaagctgggtccta</u> TCTCTTGTGTTGTCTCGAA   |
| CEP215 aa 900 R          | <u>ggggaccactttgtacaagaagctgggtccta</u> GGCTAGTTGTGACGTGAG    |
| CEP215 aa1190 R          | <u>ggggaccactttgtacaagaagctgggtccta</u> CTTTTGAAGCTGAAATAT    |
| HSET aa1 F               | <u>ggggacaagttgtacaaaaagcaggcttc</u> TGGCGGCGGTGGGGTCTG<br>GA |

|               |                                                                    |
|---------------|--------------------------------------------------------------------|
| HSET aa673 R  | <u>ggggaccactttgtacaagaaagctgggtccta</u> TGACTTCCGGTTGGCGTG        |
| HSET aa150 R  | <u>ggggaccactttgtacaagaaagctgggtccta</u> GACCTAAATGCAGAACTA        |
| HSET aa151 F  | <u>ggggacaagttgtacaaaaagcaggcttc</u> AAACGGTGCCGTGAGAGG            |
| HSET aa300 R  | <u>ggggaccactttgtacaagaaagctgggtccta</u> GAGTTCCTGCAGCTGGTT        |
| HSET aa300 F  | <u>ggggacaagttgtacaaaaagcaggcttc</u> aACCAGCTGCAGGAACTCA<br>A      |
| HSET aa 673 R | <u>ggggaccactttgtacaagaaagctgggtccta</u> TCACTTCCTGTTGGCCTGA<br>GC |

**Supplementary Table 2. List of primers used in the study.**
